# Supplementary material
Source: Springer Nature journal article supplement (https://www.springermedizin.de/resource/supplementary/12885_2014_5100_MOESM2_ESM.pdf/9468414)

Score plot

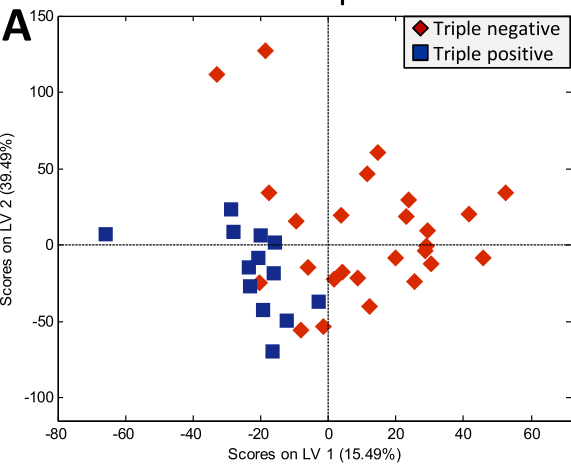

Loading plot

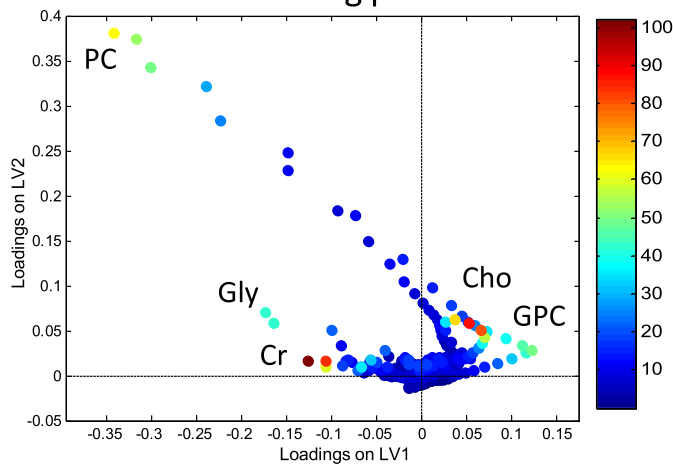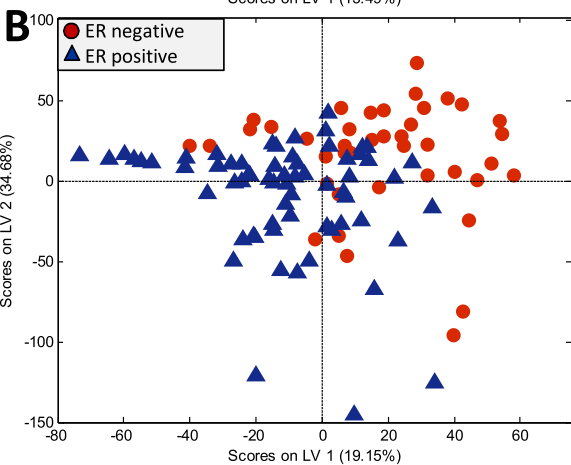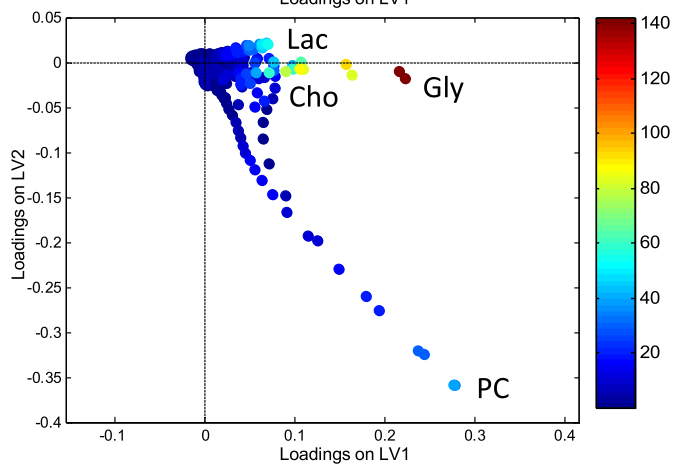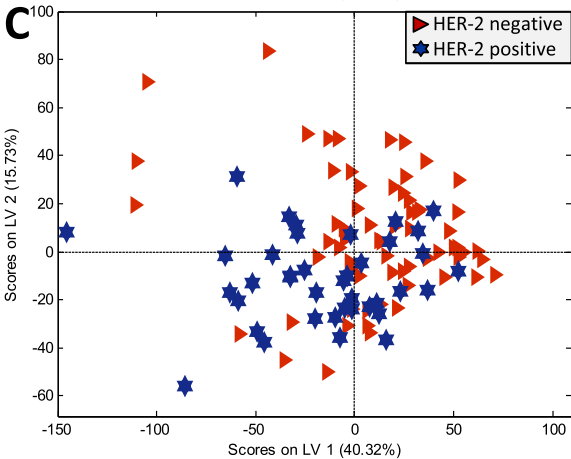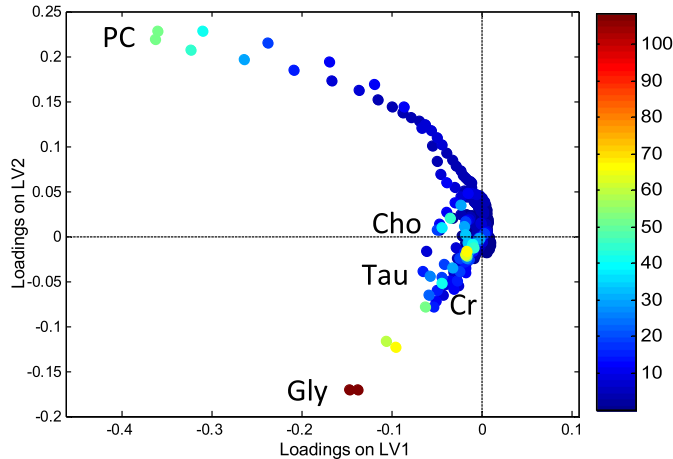

Supplement: MOESM2 [file 9468414]
